# Supplementary material
Source: Royal Society of Chemistry journal article supplement (doi:10.1039/d6ta00731g)
Supplement: d6ta00731g1.pdf [file d6ta00731g1.pdf]

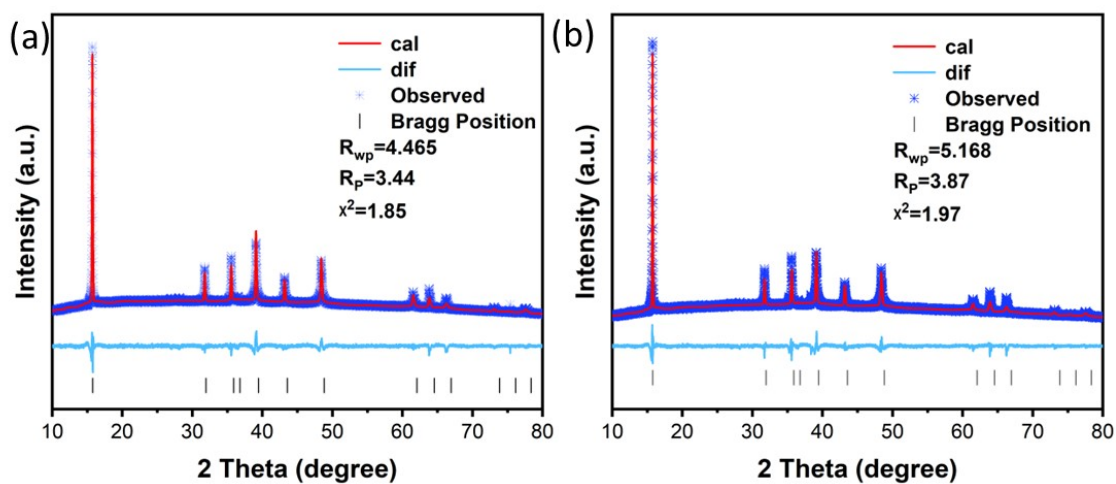

**Figure S1.** Rietveld refinements of (a)  $\text{Na}_{0.67}\text{Ni}_{0.23}\text{Mn}_{0.67}\text{Cu}_{0.05}\text{O}_2$  and (b)

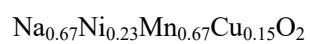

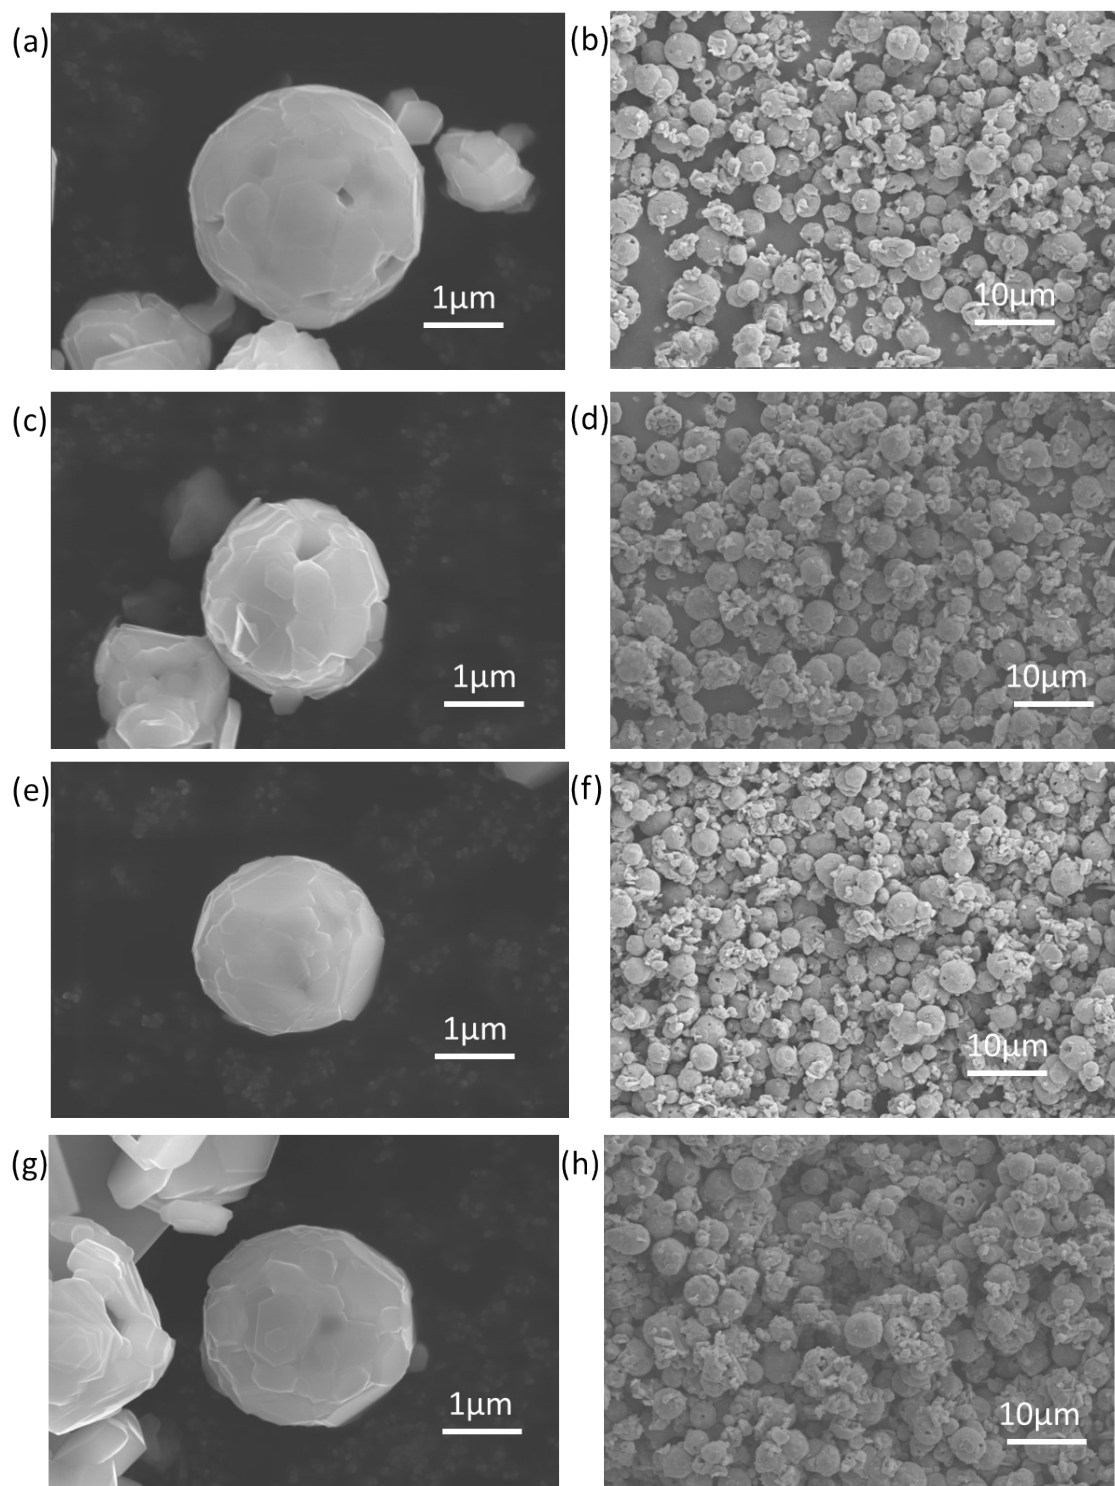

**Figure S2.** SEM of (a) and (b)  $\text{Na}_{0.67}\text{Ni}_{0.33}\text{Mn}_{0.67}\text{O}_2$ , (c) and (d)  $\text{Na}_{0.67}\text{Ni}_{0.23}\text{Mn}_{0.67}\text{Cu}_{0.05}\text{O}_2$ , (e) and (f)  $\text{Na}_{0.67}\text{Ni}_{0.23}\text{Mn}_{0.67}\text{Cu}_{0.1}\text{O}_2$ , (g) and (h)  $\text{Na}_{0.67}\text{Ni}_{0.23}\text{Mn}_{0.67}\text{Cu}_{0.15}\text{O}_2$ .

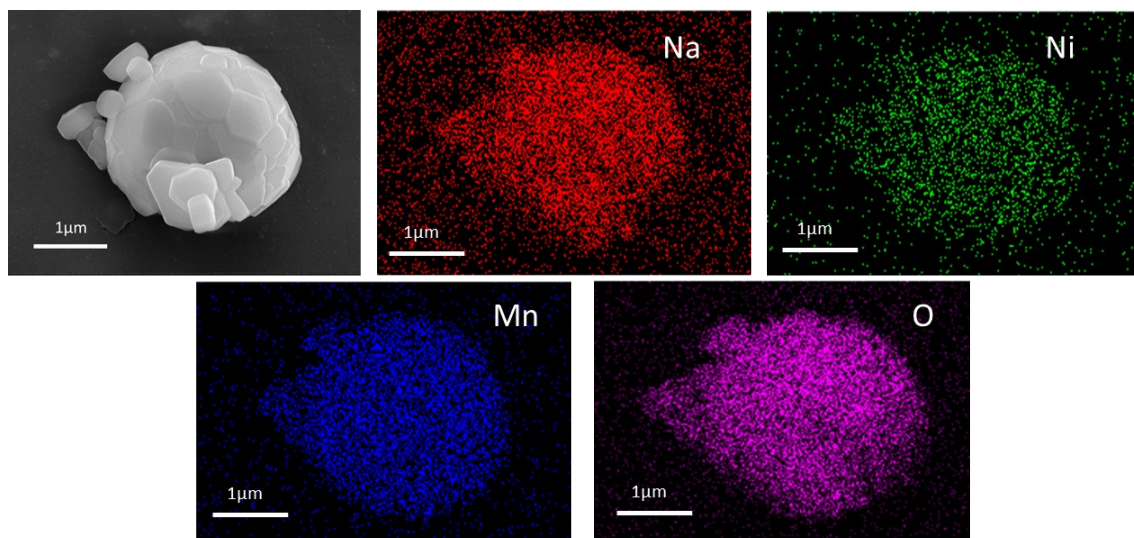

**Figure S3.** EDS of  $\text{Na}_{0.67}\text{Ni}_{0.33}\text{Mn}_{0.67}\text{O}_2$

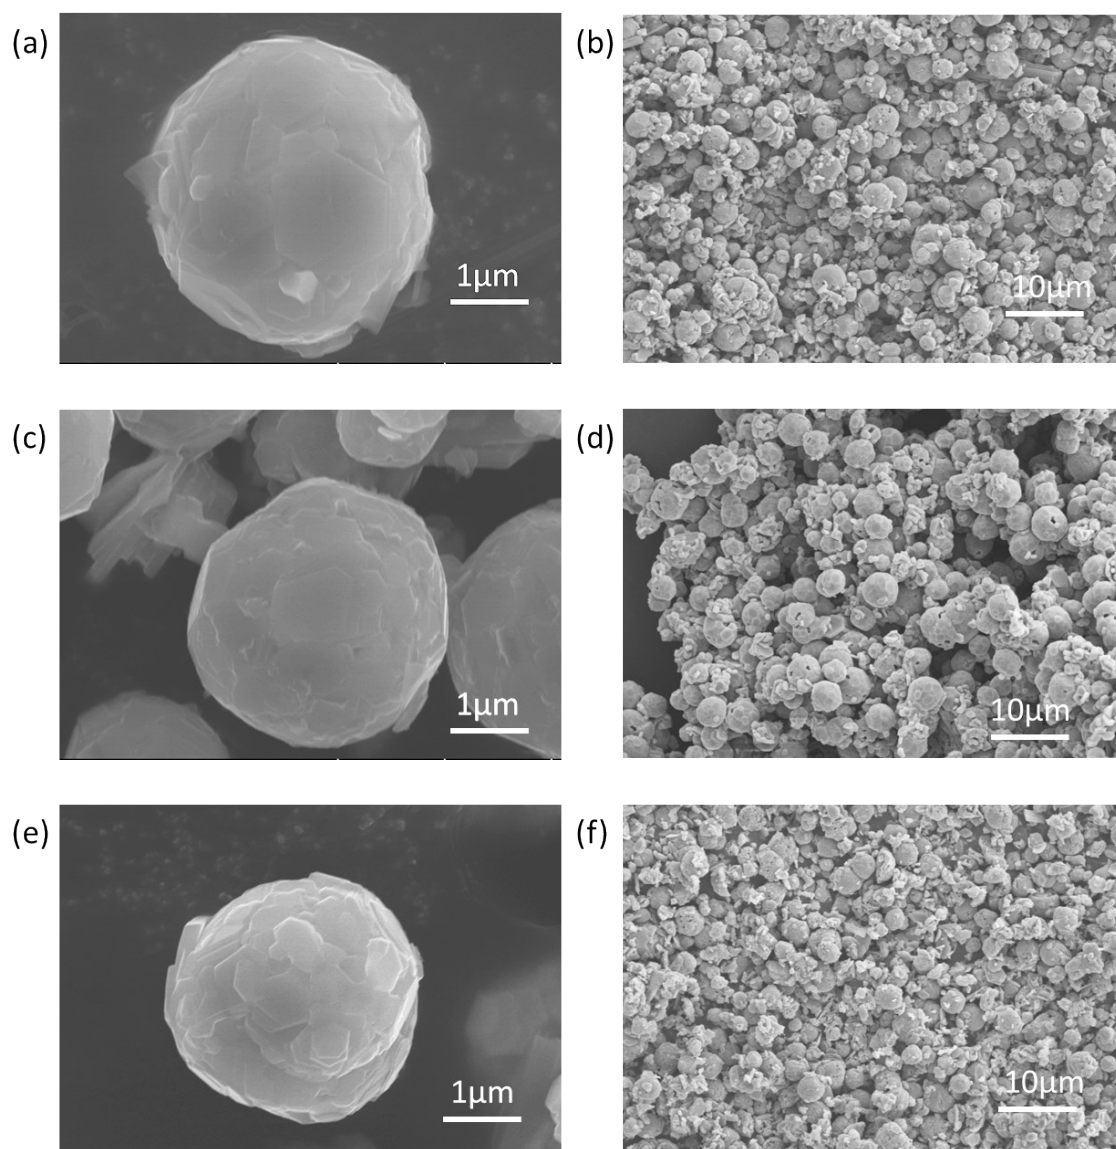

**Figure S4.** SEM of (a) and (b)  $\text{Na}_{0.67}\text{Ni}_{0.23}\text{Mn}_{0.67}\text{Cu}_{0.1}\text{O}_{0.9}\text{F}_{0.05}$ , (c) and (d)  $\text{Na}_{0.67}\text{Ni}_{0.23}\text{Mn}_{0.67}\text{Cu}_{0.1}\text{O}_{0.9}\text{F}_{0.1}$ , (e) and (f)  $\text{Na}_{0.67}\text{Ni}_{0.23}\text{Mn}_{0.67}\text{Cu}_{0.1}\text{O}_{0.85}\text{F}_{0.15}$

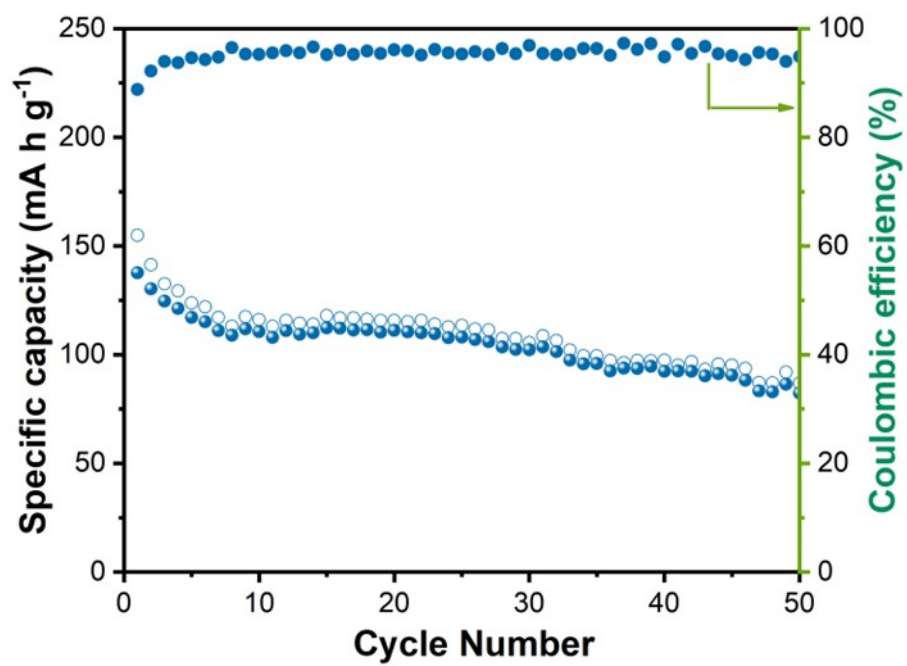

Figure S5. Cycling performance at 0.1 C between 2.0 and 4.4 V of NNM.

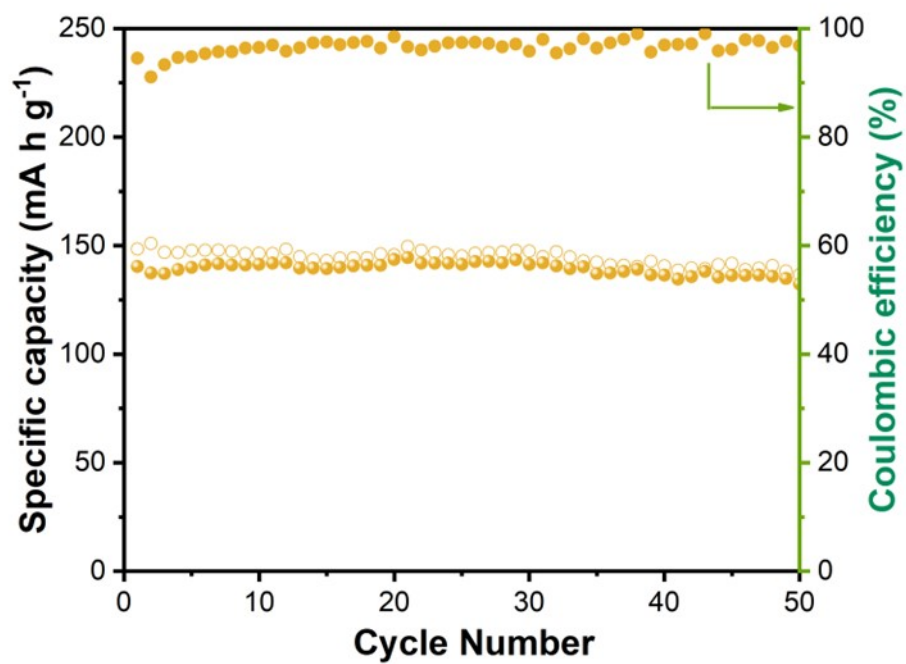

Figure S6. Cycling performance at 0.1 C between 2.0 and 4.4 V of NNMC10F10.

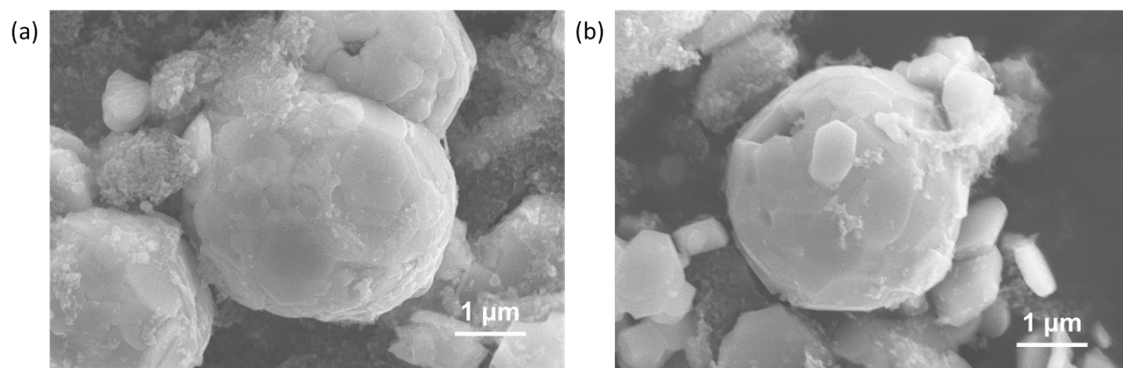

**Figure S7.** SEM after 100 cycles of (a) NNM and (b) NNMC10F10.

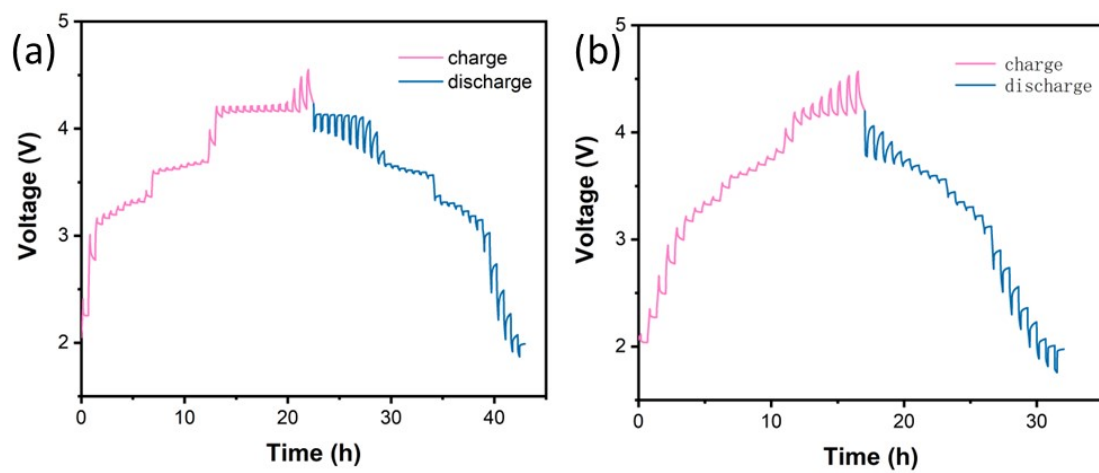

**Figure S8.** GITT curves of P2-type cathode material (a) NNM and (b) NNMC10F10.

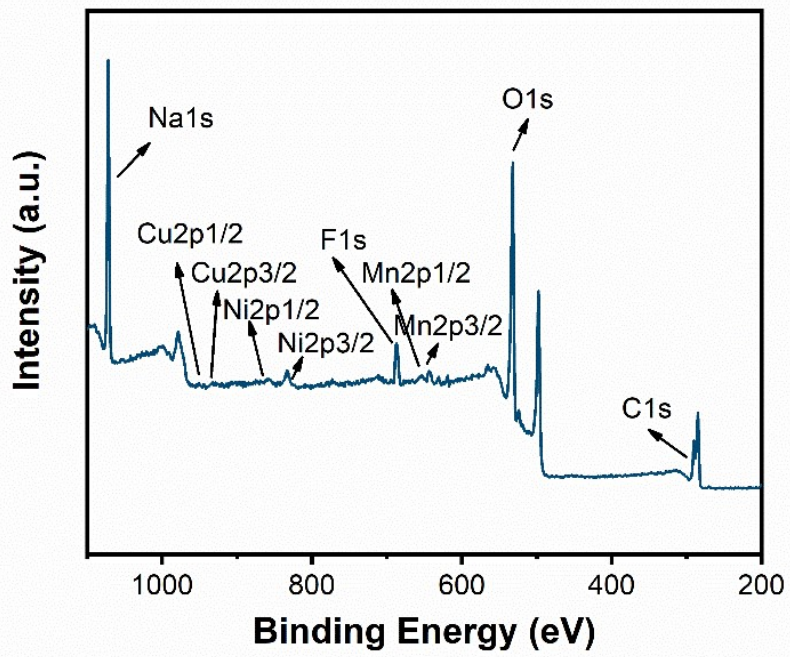

**Figure S9.** XPS spectrum after the NNM10F10 cycle.

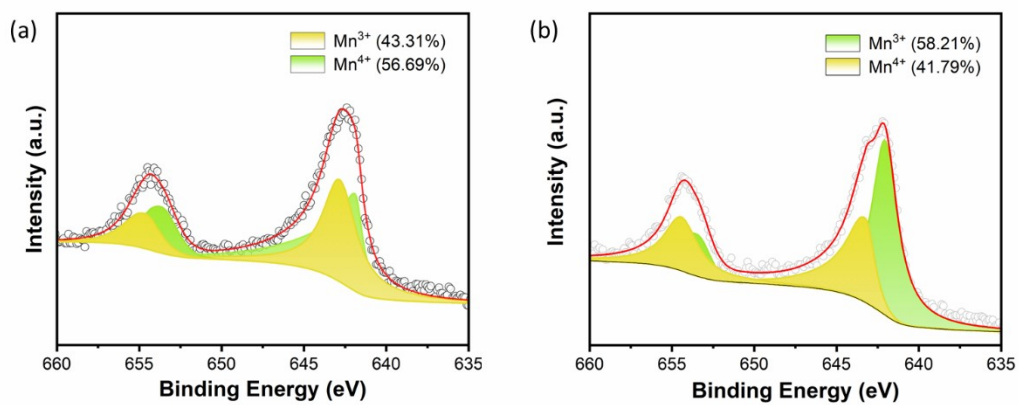

**Figure S10.** XPS tests of (a) NNM and (b) NNMC10F10 for Mn 2p spectrum.

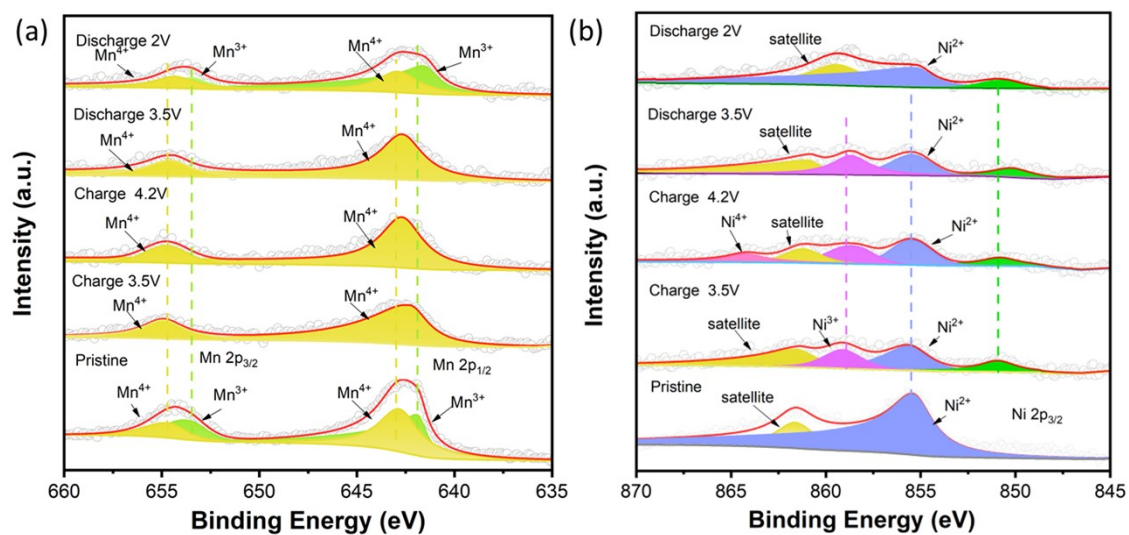

**Figure S11.** Ex situ XPS tests of NNM for (a) Mn 2p spectrum and (b) Ni 2p spectrum.

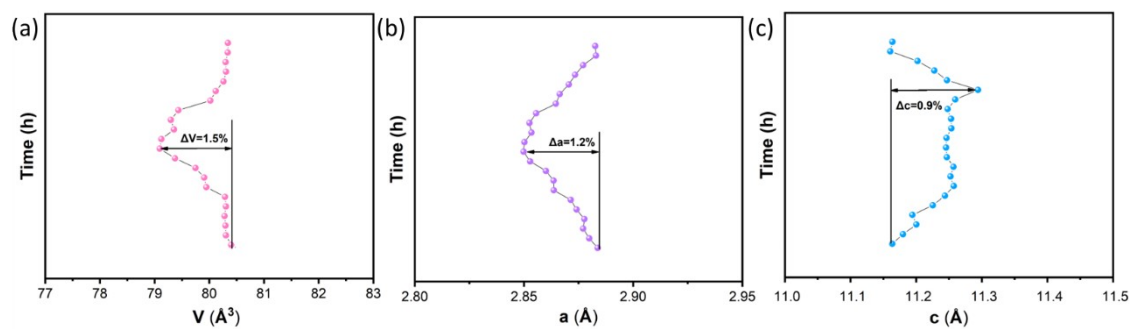

**Figure S12.** Changes in structural parameters during in-situ XRD testing (a) unit cell volume  $V$ ,  
(b) lattice parameter  $a$  and (c) lattice parameter  $c$ .

**Table S1.** Detailed structural parameters of the  $\text{Na}_{0.67}\text{Ni}_{0.33-x}\text{Mn}_{0.67}\text{Cu}_x\text{O}_2$  ( $x=0, 0.05, 0.1, 0.15$ ) samples determined by the XRD Rietveld refinement.

| Synthesized samples | a (Å)   | c (Å)    | V (Å <sup>3</sup> ) | Rwp    |
|---------------------|---------|----------|---------------------|--------|
| x=0                 | 2.90647 | 11.21019 | 82.012              | 4.472% |
| x=0.05              | 2.90792 | 11.22016 | 82.166              | 6.742% |
| x=0.1               | 2.91355 | 11.25674 | 82.754              | 4.465% |
| x=0.15              | 2.91212 | 11.28198 | 82.858              | 5.168% |

**Table S2.** Detailed structural parameters of the  $\text{Na}_{0.67}\text{Ni}_{0.23}\text{Mn}_{0.67}\text{Cu}_{0.1}\text{O}_{2-y}\text{F}_y$  ( $y=0, 0.05, 0.1, 0.15$ ) samples determined by the XRD Rietveld refinement.

| Synthesized samples | a (Å)   | c (Å)    | V (Å <sup>3</sup> ) | Rwp    |
|---------------------|---------|----------|---------------------|--------|
| y=0.05              | 2.90577 | 11.22478 | 82.079              | 5.52%  |
| y=0.1               | 2.87360 | 11.22690 | 80.287              | 5.04%  |
| y=0.15              | 2.91511 | 11.23157 | 82.657              | 6.613% |

**Table S3.** Comparison of BET specific surface areas of the three samples: solid NNM, microsphere NNM, and microsphere NNMC10F10

| Thermophysical properties                          | Solid-phase sample | Sphere NNM | Sphere Cu <sub>0.1</sub> F <sub>0.1</sub> |
|----------------------------------------------------|--------------------|------------|-------------------------------------------|
| BET Surface Area (m <sup>2</sup> g <sup>-1</sup> ) | 7.3839             | 3.5242     | 0.0985                                    |
| BJH Adsorption average pore diameter (nm)          | 6.0066             | 4.5712     | 15.3932                                   |
| BJH Desorption average pore diameter (nm)          | 6.4153             | 6.2709     | 40.0035                                   |

**Table S4.** Comparison of unit cell volume variation between this work and other previously reported sodium layered oxide cathodes.

| Sample                                                                                                          | Volume change | Reference(s)     |
|-----------------------------------------------------------------------------------------------------------------|---------------|------------------|
| P2-Na <sub>0.7</sub> Ni <sub>0.2</sub> Co <sub>0.2</sub> Mn <sub>0.5</sub> Fe <sub>0.1</sub> O <sub>2</sub>     | 11.90%        | 1                |
| P2-Na <sub>0.67</sub> Ni <sub>0.18</sub> Mn <sub>0.67</sub> Cu <sub>0.1</sub> Zn <sub>0.05</sub> O <sub>2</sub> | 6.96%         | 2                |
| P2-Na <sub>0.66</sub> Li <sub>0.18</sub> Fe <sub>0.12</sub> Mn <sub>0.7</sub> O <sub>2</sub>                    | 3.50%         | 3                |
| P2-Na <sub>0.67</sub> Mn <sub>0.7</sub> Cu <sub>0.15</sub> Ti <sub>0.15</sub> O <sub>2</sub>                    | 3.20%         | 4                |
| Na <sub>3</sub> V <sub>2</sub> (PO <sub>4</sub> ) <sub>2</sub> O <sub>2</sub> F                                 | 2.56%         | 5                |
| P2-Na <sub>0.56</sub> Co <sub>0.17</sub> Mn <sub>0.8</sub> La <sub>0.03</sub> O <sub>2</sub>                    | 1.90%         | 6                |
| P2-Na <sub>2/3</sub> Mn <sub>1/2</sub> Ni <sub>1/6</sub> Co <sub>1/3</sub> O <sub>2</sub>                       | 1.90%         | 7                |
| <b>This work</b>                                                                                                | <b>1.50%</b>  | <b>This work</b> |

**Table S5.** The elemental molar ratio of the material was determined through inductively coupled plasma (ICP) analysis.

| Sample                                                                                        | Na       | Ni       | Cu       | Mn   |
|-----------------------------------------------------------------------------------------------|----------|----------|----------|------|
| $\text{Na}_{0.67}\text{Ni}_{0.33}\text{Mn}_{0.67}\text{O}_2$                                  | 0.674396 | 0.328932 | □        | 0.67 |
| $\text{Na}_{0.67}\text{Ni}_{0.23}\text{Mn}_{0.67}\text{Cu}_{0.1}\text{O}_2$                   | 0.672936 | 0.237554 | 0.119647 | 0.67 |
| $\text{Na}_{0.67}\text{Ni}_{0.23}\text{Mn}_{0.67}\text{Cu}_{0.1}\text{O}_{1.9}\text{F}_{0.1}$ | 0.662782 | 0.230833 | 0.106393 | 0.67 |

**Table S6.** Performance comparison between our work and other reported works.

| Sample                                                                                                            | Initial capacity (mA g <sup>-1</sup> ) | Cycling Retention                        | Voltage Window (V) | Reference        |
|-------------------------------------------------------------------------------------------------------------------|----------------------------------------|------------------------------------------|--------------------|------------------|
| P2- Na <sub>0.66</sub> Li <sub>0.18</sub> Mn <sub>0.71</sub> Mg <sub>0.21</sub> Co <sub>0.08</sub> O <sub>2</sub> | 166                                    | 82%, 100 cycle, 20 mA g <sup>-1</sup>    | 1.5-4.5            | 8                |
| P2-Na <sub>0.93</sub> Li <sub>0.07</sub> Cu <sub>0.07</sub> Ni <sub>0.29</sub> Mn <sub>0.57</sub> O <sub>2</sub>  | 110                                    | 85%, 200 cycle, 0.2 C                    | 2.0-4.2            | 9                |
| O3-Na [Fe <sub>1/3</sub> Ni <sub>1/3</sub> Mn <sub>1/3</sub> ] <sub>0.95</sub> Cu <sub>0.05</sub> O <sub>2</sub>  | 127.2                                  | 80.7%, 200 cycle, 0.5 C                  | 2.0-4.0            | 10               |
| P2-Na <sub>0.67</sub> Fe <sub>0.1</sub> Mn <sub>0.8</sub> Cu <sub>0.1</sub> F <sub>0.1</sub> O <sub>1.9</sub>     | 163.8                                  | 80.6%, 100 cycle, 100 mA g <sup>-1</sup> | 1.5-4.5            | 11               |
| P2-Na <sub>2/3</sub> Zn <sub>0.18</sub> Ti <sub>0.10</sub> Mn <sub>0.72</sub> O <sub>2</sub>                      | 134                                    | 78.2%, 50 cycle, 0.1 C                   | 2.0-4.6            | 12               |
| O3-NaMn <sub>0.48</sub> Fe <sub>0.32</sub> Cu <sub>0.2</sub> O <sub>2</sub>                                       | 103.76                                 | 82.9%, 100 cycle, 24 mA g <sup>-1</sup>  | 2.1-4.3            | 13               |
| P2-Na <sub>0.66</sub> Ni <sub>0.12</sub> Li <sub>0.05</sub> Cu <sub>0.10</sub> Mn <sub>0.72</sub> O <sub>2</sub>  | 113.5                                  | 82.15%, 100cycle, 1 C                    | 2-4.5              | 14               |
| P2-Na <sub>0.6</sub> Ni <sub>0.2</sub> Mn <sub>0.7</sub> Cu <sub>0.1</sub> O <sub>2</sub>                         | 135                                    | 76%, 100cycle, 0.1 C                     | 2-4.5              | 15               |
| P2-Na <sub>0.67</sub> Ni <sub>0.33</sub> Mn <sub>0.57</sub> Cu <sub>0.05</sub> Mo <sub>0.05</sub> O <sub>2</sub>  | 120                                    | 80.2%, 200cycle, 0.5 C                   | 2-4.5              | 116              |
| P2-Na <sub>0.67</sub> Fe <sub>0.3</sub> Mn <sub>0.5</sub> Cu <sub>0.15</sub> Ti <sub>0.05</sub> O <sub>2</sub>    | 161.3                                  | 77.1%, 100 cycle, 200 mA g <sup>-1</sup> | 1.5-4.3            | 17               |
| <b>P2- Na<sub>0.67</sub>Ni<sub>0.23</sub>Mn<sub>0.67</sub>Cu<sub>0.1</sub>O<sub>0.9</sub>F<sub>0.1</sub></b>      | 130.8                                  | 88.07%, 100cycle, 1 C                    | 2-4.4              | <b>This work</b> |

## REFERENCES

- [1] Jeong S, Kim I, Eom S, Hwang H, Jung Y and Kim J. Engineering the local chemistry through Fe substitution in layered P2-Na<sub>0.7</sub>Ni<sub>0.2</sub>Co<sub>0.2</sub>Mn<sub>0.6</sub>O<sub>2</sub> for high-performance Sodium-Ion batteries. *Energy Storage Materials* 75 (2025) 104041.
- [2] Yin S, Tao Z, Zhang Y, Zhang X, Yu L, Ji F, Ma X, Yuan G and Zhang G. Constructing a Size-Controllable Spherical P2-Type Layered Oxides Cathode That Achieves Practicable Sodium-Ion Batteries. *ACS Appl. Mater. Interfaces* 2024, 16, 20, 26340-26347.
- [3] Yang L, Li X, Liu J, Xiong S, Ma X, Liu P, Bai J, Xu W, Tang Y, Hu Y, Liu M and Chen H. Lithium-Doping Stabilized High-Performance P2-Na<sub>0.66</sub>Li<sub>0.18</sub>Fe<sub>0.12</sub>Mn<sub>0.7</sub>O<sub>2</sub> Cathode for Sodium Ion Batteries. *J. Am. Chem. Soc.* 2019, 141, 16, 6680-6689.
- [4] Zhang X, Qiu F, Jiang K, He P, Han M, Gou S and Zhou H. Improving the structural and cyclic stabilities of P2-type Na<sub>0.67</sub>MnO<sub>2</sub> cathode material via Cu and Ti co-substitution for sodium ion batteries. *Chem. Commun.*, 2020, 56, 6293.
- [5] Gou J, Wang L, Wu X, Zhang X, Yan Q, Chen H, Zhang J and Gou Y. High-Energy/Power and Low-Temperature Cathode for Sodium-Ion Batteries: In Situ XRD Study and Superior Full-Cell Performance. *Adv. Mater.* 2017, 29, 1701968.
- [6] Xia F, Tie D, Wang J, Song H, Wen W, Ye X, Wu J, Hou Y, Lu X and Zhao Y. Ultrahigh rate and durable sodium-ion storage at a wide potential window via lanthanide doping and perovskite surface decoration on layered manganese oxides. *Energy Storage Materials* 42 (2021) 209-218.
- [7] Liu Z, Shen J, Feng S, Huang Y, Wu D, Li F, Zhu Y, Gu M, Liu Q, Liu J and Zhu M. Ultralow Volume Change of P2-Type Layered Oxide Cathode for Na-Ion Batteries with Controlled Phase Transition by Regulating Distribution of Na. *Angew. Chem. Int. Ed.* 2021, 60, 20960-20969.
- [8] Xiao J, Zhang F, Tang K, Li X, Wang D, Wang Y, Liu H, Wu M and Wang G. Rational Design of a P2-Type Spherical Layered Oxide Cathode for High-Performance Sodium-Ion Batteries. *ACS Cent. Sci.* 2019, 5, 12, 1937-1945.

- [9] Anilkumar A, Nair N, Nair S and Baskar S. Tailoring high Na content in P2-type layered oxide cathodes via Cu-Li dual doping for sodium-ion batteries. *Journal of Energy Storage* 72 (2023) 108291.
- [10] Xu X, Liu G, Su C, Zhang Y and Wen L. High stability of Cu-doped O3-type  $\text{NaNi}_{1/3}\text{Fe}_{1/3}\text{Mn}_{1/3}\text{O}_2$  cathode material for sodium-ion battery. *Ionics* (2024) 30: 4021-4031.
- [11] Zhang Y, Liu G, Su C, Liu G, Sun H, Qiao D and Wen L. Study on the influence of Cu/F dual-doping on the Fe-Mn based compound as cathode material for sodium ion batteries. *Journal of Power Sources* 536 (2022) 231511.
- [12] Chen C, Zhao C, Liu H, Wu X, Hu B, Li J, Hu B and Li C. Mitigating the Formation of Tetrahedral Zn in Layered Oxides Enables Reversible Lattice Oxygen Redox Triggering by the Na-O-Zn Configuration. *ACS Nano* 2023, 17, 12, 11406-11413.
- [13] Zhang Z, Liu Y, Liu Z, Li H, Huang Y, Liu W, Ruan D, Cai X and Yu X. Dual-strategy of Cu-doping and O3 biphasic structure enables Fe/Mn-based layered oxide for high-performance sodium-ion batteries cathode. *Journal of Power Sources* 567 (2023) 232930.
- [14] Yu H, Yu M, Zheng Z, Ma H, Wang J, Zhang Z, Li C, Guo H, Zhang Y and Dong P. Li and Cu double-doped P2-type sodium-ion layered oxide cathode materials with enhanced high-voltage stability. *Journal of Alloys and Compounds* 1020 (2025) 179425.
- [15] Jiang J, He H, Cheng C, Yan T, Xia X, Ding M, He L, Chan T and Zhang L. Improving Structural and Moisture Stability of P2-Layered Cathode Materials for Sodium-Ion Batteries. *ACS Appl. Energy Mater.* 2022, 5, 1, 1252-1261.
- [16] Xue L, Wang J, Teng Y, Lu J and Shuo B. Enhancing the electrochemical performance of P2-type layered cathode by Cu/Mo co-substitution. *Materials Letters* 303 (2021) 130507.
- [17] Li Y, Feng A, Yang T, Chen N, Li A, Yang Y, Liu R, Zhang L and Qin X. Enhanced stability in a layered P2- $\text{Na}_{0.67}\text{Fe}_{0.5}\text{Mn}_{0.5}\text{O}_2$  cathode for sodium ion batteries via a synergistic Cu/Ti co-doping strategy. *Inorg. Chem. Front.*, 2025, 12,

7250-7260.
